# Supplementary material for: Remarkable thermoelectric property enhancement in Cu2SnS3–CuCo2S4 nanocomposites via 3D modulation doping
Source: Royal Society of Chemistry journal article supplement (doi:10.1039/d1ta02812j), 2021-01-01
Supplement: d1ta02812j1.pdf [file d1ta02812j1.pdf]

## Supporting Information

### **Remarkable thermoelectric property enhancement in $\text{Cu}_2\text{SnS}_3\text{-CuCo}_2\text{S}_4$ nanocomposites via 3D modulation doping**

*Yan Gu,<sup>a</sup> Wen Ai <sup>a</sup>, Yaqing Zhao <sup>a</sup>, Lin Pan <sup>a</sup>, Chunhua Lu <sup>a</sup>, Peng'an Zong <sup>a</sup>, Xiaohui Hu <sup>a</sup>, Zhongzi Xu <sup>a</sup>, Yifeng Wang,<sup>a,b\*</sup>*

<sup>a</sup>.College of Materials Science and Engineering, Nanjing Tech University, Nanjing 210009, China.

<sup>b</sup>.Jiangsu Collaborative Innovation Center for Advanced Inorganic Function Composites, Nanjing Tech University, Nanjing 210009, China.

Keyword:  $\text{Cu}_2\text{SnS}_3$ ,  $\text{CuCo}_2\text{S}_4$ , modulation doping, ZT, thermoelectric.

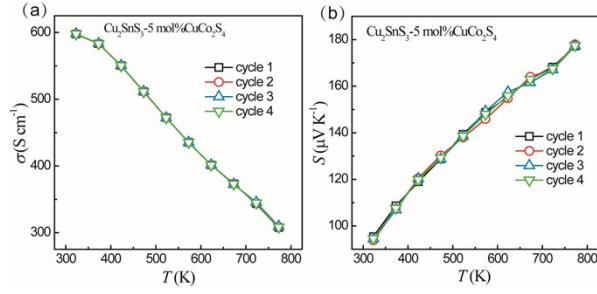

Figure S1. Temperature dependence of (a) electrical conductivity and (b) Seebeck coefficient of CTS-5 mol%CCS sample by four cyclic test from 323 K to 773 K.

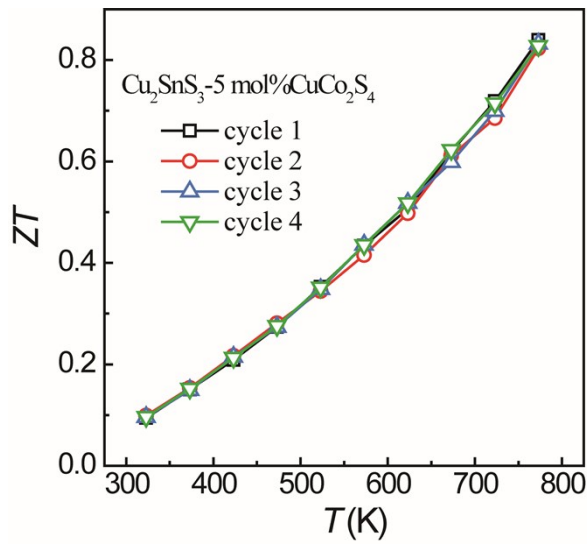

Figure S2. Temperature dependence of  $ZT$  values of CTS-5 mol%CCS sample by four cyclic test from 323 K to 773 K.
